# Supplementary material for: Modelling BMI Trajectories in Children for Genetic Association Studies
Source: PLoS One. 2013 Jan 17;8(1):e53897. doi: 10.1371/journal.pone.0053897 (PMC3547961; doi:10.1371/journal.pone.0053897)
Supplement: Table S3 — Results of genetic association analysis in males for all 17 SNPs in each of the four statistical methods. (XLSX) [file pone.0053897.s003.xlsx]

## Sheet: Table S3 - Male Genetics
Table S3: Results of genetic association analysis in males for all 17 SNPs in each of the four statistical methods.
	LMM				STLMM				SPLMM				NLMM
SNP	Coefficient	Std.Error	P-value	LRT P-value	Coefficient	Std.Error	P-value	LRT P-value	Coefficient	Std.Error	P-value	LRT P-value		Coefficient	Std.Error	P-value
rs2815752	0.0093851	0.00672646	0.163346	0.640834	-0.0071565	0.0727681	0.921662	0.984206	0.00687112	0.00695667	0.323611	0.759954	Size	0.000664818	0.00247696	0.788463
I(Age-8):rs2815752	0.000842554	0.000936103	0.368142		0.00490628	0.0110621	0.657414		0.000569066	0.00117243	0.627439		Tempo	-0.0115859	0.00975343	0.235254
I(Age-8)^2:rs2815752	-5.88692e-05	8.77853e-05	0.502513		0.000488733	0.000867918	0.573392		0.00182424	0.00154603	0.238093		Velocity	0.00220399	0.00581148	0.704609
I(Age-8)^3:rs2815752	3.22568e-06	1.31776e-05	0.806636		-0.000115239	0.000168772	0.494767		0.00106942	0.000775986	0.16824
rs10913469	0.000238557	0.00789457	0.975901	0.256485	0.0426154	0.0883006	0.629394	0.298337	-0.00162442	0.00817274	0.842503	0.164841	Size	-0.00211426	0.0028994	0.4661
I(Age-8):rs10913469	0.00180633	0.00109532	0.0992023		0.0265312	0.0131085	0.0430404		-0.000238989	0.00136825	0.86135		Tempo	-0.00448743	0.0114426	0.695044
I(Age-8)^2:rs10913469	-7.96575e-06	0.000102587	0.938111		-0.000726629	0.00104618	0.487375		-0.000109946	0.00184551	0.952498		Velocity	-0.00408691	0.00680478	0.54829
I(Age-8)^3:rs10913469	-2.96992e-05	1.53947e-05	0.0537826		-0.00025514	0.000197159	0.195712		8.79852e-05	0.000939233	0.92537
rs2605100	-0.00609953	0.00712401	0.39216	0.319272	-0.0140328	0.0768387	0.8551	0.614893	-0.00818494	0.00736172	0.266564	0.648612	Size	-0.00430287	0.00261179	0.0998727
I(Age-8):rs2605100	0.000169298	0.000985196	0.863571		0.0159249	0.012992	0.220365		-0.000496814	0.00123145	0.686648		Tempo	-0.00262578	0.0103383	0.799576
I(Age-8)^2:rs2605100	-4.86886e-05	9.28585e-05	0.600079		0.000344908	0.000932077	0.711371		0.00130912	0.00162403	0.42024		Velocity	-0.00506444	0.00614478	0.410092
I(Age-8)^3:rs2605100	-7.98731e-06	1.37865e-05	0.562382		-0.000323306	0.000182857	0.0771232		0.000783343	0.000818362	0.338523
rs6548238	0.0144992	0.00961947	0.132168	0.0173966	0.100943	0.0966529	0.296369	0.0118658	0.014382	0.00998621	0.150239	0.0180445	Size	0.00205932	0.00350417	0.55693
I(Age-8):rs6548238	0.00434051	0.00134428	0.00125362		0.0657418	0.0168071	9.323e-05		0.00325385	0.00169215	0.0545693		Tempo	-0.0236066	0.0137831	0.0871851
I(Age-8)^2:rs6548238	0.000121087	0.000125369	0.334185		0.00212374	0.00118366	0.0728541		0.000556384	0.00224155	0.803982		Velocity	0.0129759	0.00819654	0.113829
I(Age-8)^3:rs6548238	-4.88884e-05	1.87577e-05	0.00918913		-0.000887475	0.000249028	0.000369857		0.000264587	0.00113854	0.816247
rs7647305	0.00545779	0.00826127	0.509037	0.748549	0.0613887	0.0986169	0.533651	0.462326	0.00524353	0.00856228	0.540457	0.3996	Size	0.00248719	0.00303301	0.412449
I(Age-8):rs7647305	0.000487589	0.00114095	0.669145		0.0255286	0.0140257	0.068814		0.00169634	0.00143556	0.237415		Tempo	-0.00443463	0.0119724	0.711184
I(Age-8)^2:rs7647305	5.10438e-05	0.00010661	0.632117		0.00148392	0.00103356	0.151154		0.00169269	0.00192478	0.379229		Velocity	0.00369101	0.00712054	0.604357
I(Age-8)^3:rs7647305	-3.19822e-06	1.58584e-05	0.840183		-0.000258788	0.000210468	0.218926		0.000781576	0.000966996	0.418996
rs10938397	0.00922778	0.0067218	0.170219	0.517249	0.0960521	0.0683117	0.159777	0.336275	0.00571089	0.00694308	0.411036	0.0475413	Size	0.00325903	0.00246586	0.186684
I(Age-8):rs10938397	0.0011217	0.000931371	0.22853		0.00850636	0.0108614	0.433572		0.00334574	0.00116726	0.00417603		Tempo	-0.000491762	0.00975213	0.959796
I(Age-8)^2:rs10938397	-5.40231e-06	8.7346e-05	0.950686		-0.000160524	0.000841127	0.848658		0.00324512	0.00153241	0.0342695		Velocity	0.00326923	0.00580729	0.573635
I(Age-8)^3:rs10938397	-1.06326e-05	1.29827e-05	0.412849		-0.000212593	0.000165667	0.199477		0.00109853	0.000773614	0.155694
rs987237	0.0224793	0.0083723	0.00741138	0.0963642	0.1314	0.0950193	0.166781	0.274778	0.0229226	0.0086685	0.00835274	0.260422	Size	0.00232336	0.00309775	0.453477
I(Age-8):rs987237	0.000956494	0.00116329	0.410996		-0.00967914	0.0148787	0.515384		0.0011132	0.00146758	0.448183		Tempo	-0.0111002	0.0122151	0.363784
I(Age-8)^2:rs987237	-0.000248405	0.000109084	0.0228301		-0.00245537	0.00112573	0.0292316		-0.000622287	0.00195418	0.750169		Velocity	-0.00514567	0.00726927	0.479245
I(Age-8)^3:rs987237	9.25151e-06	1.63094e-05	0.570579		0.000396643	0.000217338	0.0680741		-6.69635e-05	0.000996845	0.946446
rs613080	0.00488606	0.00905612	0.589679	0.621182	-0.0755956	0.104509	0.469513	0.21801	0.00758331	0.00935033	0.417608	0.0899426	Size	0.0023715	0.00333204	0.476854
I(Age-8):rs613080	-0.000439299	0.001245	0.724219		-0.0371503	0.0152637	0.0149807		-0.00300309	0.00157138	0.0560656		Tempo	-0.00205546	0.0130803	0.875175
I(Age-8)^2:rs613080	-9.02767e-06	0.00011821	0.939129		-0.00155552	0.00116572	0.182155		-0.00169335	0.00208482	0.41671		Velocity	0.00703009	0.00782624	0.369327
I(Age-8)^3:rs613080	2.11566e-05	1.74911e-05	0.226522		0.000554453	0.000211421	0.00876149		7.39065e-05	0.00107083	0.944979
rs10838738	0.0123146	0.00705235	0.0811848	0.462436	0.0949788	0.0775345	0.220652	0.17789	0.010874	0.00729316	0.136379	0.842807	Size	0.000147998	0.0026086	0.954772
I(Age-8):rs10838738	0.000609399	0.00097221	0.530816		-0.0102506	0.0117382	0.382572		0.000631139	0.00122185	0.605505		Tempo	-0.0103572	0.0102762	0.313832
I(Age-8)^2:rs10838738	-0.000146075	9.14371e-05	0.110228		-0.00170439	0.000894855	0.0568969		0.000316142	0.00162317	0.845585		Velocity	-0.00238972	0.00611973	0.69628
I(Age-8)^3:rs10838738	6.01511e-06	1.36139e-05	0.658633		0.000443394	0.000183148	0.0155237		0.000322694	0.000824218	0.695438
rs1488830	0.0130475	0.00804643	0.105321	0.118905	0.0693404	0.0870367	0.425684	0.20186	0.0165074	0.00832071	0.0476272	0.124874	Size	0.0050222	0.00295787	0.0899349
I(Age-8):rs1488830	0.00210125	0.00111325	0.0591718		0.017776	0.013798	0.197717		0.00151295	0.00138639	0.275215		Tempo	-0.0107318	0.0116981	0.359227
I(Age-8)^2:rs1488830	7.18413e-05	0.000104372	0.491294		0.00224434	0.00103606	0.0303523		-0.003195	0.00183548	0.0818194		Velocity	0.0144037	0.00694819	0.0385095
I(Age-8)^3:rs1488830	-1.86546e-05	1.55645e-05	0.230786		-0.000175764	0.000212967	0.409243		-0.00177237	0.000921159	0.0544221
rs925946	0.00683794	0.00704592	0.332114	0.108666	0.0253993	0.0742692	0.732376	0.0184484	0.00560736	0.00728362	0.441622	0.227884	Size	0.0050337	0.00257692	0.0511408
I(Age-8):rs925946	0.000921295	0.000971969	0.343259		0.011107	0.0121949	0.36246		8.96648e-05	0.00122928	0.941857		Tempo	0.00604992	0.0102112	0.553704
I(Age-8)^2:rs925946	6.91435e-05	9.10976e-05	0.447897		0.0029352	0.000879483	0.000853335		0.000752176	0.00162467	0.643412		Velocity	0.0049949	0.0060715	0.410948
I(Age-8)^3:rs925946	-2.11746e-05	1.35117e-05	0.117167		-0.000372872	0.000170872	0.0291547		0.000306907	0.000825419	0.710048
rs7138803	0.0135141	0.00664791	0.0424154	0.103227	0.0407161	0.0680338	0.549561	0.929131	0.0137551	0.006873	0.0457105	0.430055	Size	0.00026452	0.00245564	0.914247
I(Age-8):rs7138803	0.00172639	0.000920948	0.0609266		0.00588189	0.010526	0.576331		0.00170454	0.00115572	0.140327		Tempo	-0.0186901	0.00963905	0.0528714
I(Age-8)^2:rs7138803	-6.67203e-05	8.63896e-05	0.439974		1.17008e-05	0.00084874	0.989001		-0.000726014	0.00153986	0.637326		Velocity	0.00631428	0.005753	0.272743
I(Age-8)^3:rs7138803	2.22931e-06	1.29761e-05	0.863603		4.21945e-05	0.000168969	0.802819		-0.000277895	0.000781587	0.722196
rs10146997	-0.0021393	0.00789551	0.786502	0.000622029	0.177187	0.0899206	0.0488526	0.000704711	-0.00317693	0.00816883	0.697452	0.00903189	Size	0.000229673	0.00294476	0.937853
I(Age-8):rs10146997	-0.00206815	0.00108396	0.056472		0.012744	0.013789	0.355428		-0.0020198	0.00135995	0.137575		Tempo	0.0355363	0.011462	0.00200417
I(Age-8)^2:rs10146997	-0.000231472	0.000102984	0.0246559		-0.00327803	0.000997491	0.00102398		-1.65857e-05	0.00181628	0.992715		Velocity	-0.0300196	0.00673161	9.45501e-06
I(Age-8)^3:rs10146997	-1.97864e-06	1.54268e-05	0.89795		-0.000236567	0.000202039	0.241708		0.000144266	0.000919395	0.875321
rs8055138	0.0116715	0.00691544	0.0918725	0.422119	0.0648295	0.0812426	0.424933	0.724414	0.0135769	0.00714053	0.0576315	0.647109	Size	0.00246757	0.00254533	0.332632
I(Age-8):rs8055138	0.000646837	0.000953818	0.497715		-0.00750156	0.0119002	0.528488		0.000463094	0.00119743	0.698971		Tempo	-0.00269146	0.0100315	0.788541
I(Age-8)^2:rs8055138	-7.86216e-05	9.0297e-05	0.383973		-0.000395708	0.000904506	0.661783		-0.000914676	0.00157407	0.561216		Velocity	-0.00297518	0.00598511	0.619265
I(Age-8)^3:rs8055138	-5.08709e-06	1.33846e-05	0.703914		0.000228674	0.000179109	0.201771		-0.00024797	0.000795293	0.755212
rs1121980	0.0259885	0.00678811	0.000139654	0.000344303	0.144267	0.0768903	0.0606902	0.199804	0.0298696	0.00702857	2.40952e-05	0.000294975	Size	-8.779e-06	0.00252821	0.99723
I(Age-8):rs1121980	0.00362402	0.00093773	0.000113122		0.0270066	0.0116293	0.0202674		0.00465815	0.00118481	8.59284e-05		Tempo	-0.0332504	0.00983244	0.00075776
I(Age-8)^2:rs1121980	-0.000155584	8.89516e-05	0.0803576		-0.000493827	0.000895544	0.581372		-0.00287137	0.00157736	0.0687839		Velocity	0.00295573	0.00595271	0.619663
I(Age-8)^3:rs1121980	-2.01885e-05	1.32476e-05	0.127609		-0.000215673	0.000176734	0.222412		-0.00150062	0.000799029	0.0604508
rs17782313	0.012745	0.00798568	0.110906	0.0941948	0.123031	0.0887913	0.165941	0.020897	0.0117398	0.00825325	0.155304	0.190175	Size	-0.00123064	0.00295539	0.67723
I(Age-8):rs17782313	0.00269812	0.00110355	0.0145321		0.0365132	0.0139488	0.00888698		0.00176234	0.00138437	0.203085		Tempo	-0.0296759	0.0115604	0.0104474
I(Age-8)^2:rs17782313	-7.79704e-06	0.000104755	0.940671		0.00164366	0.00100705	0.102725		0.000985095	0.00183889	0.592196		Velocity	0.00791711	0.00692433	0.253242
I(Age-8)^3:rs17782313	-1.10885e-05	1.56093e-05	0.477514		-7.61372e-05	0.000197386	0.699719		0.000754372	0.000930245	0.417452
rs11084753	0.00129736	0.00728306	0.858671	0.291149	-0.0321422	0.0855591	0.70718	0.50065	0.00326322	0.00753402	0.665056	0.346717	Size	0.00423088	0.00268195	0.115135
I(Age-8):rs11084753	-0.00094066	0.00100402	0.348877		-0.0231471	0.0124875	0.0638675		-0.00192756	0.00125639	0.125073		Tempo	0.00732417	0.0105587	0.488128
I(Age-8)^2:rs11084753	6.91562e-05	9.4112e-05	0.462494		-2.59353e-05	0.000943043	0.978061		-0.00174578	0.00168248	0.29952		Velocity	0.00937971	0.00628989	0.13636
I(Age-8)^3:rs11084753	1.56567e-05	1.4052e-05	0.265274		0.000171231	0.000177356	0.33437		-0.000637121	0.000846872	0.451909
score	0.00725731	0.0017903	5.67378e-05	0.00016498	0.0423136	0.021403	0.0481112	0.117682	0.00714595	0.00185428	0.000128258	0.00113746	Size	0.000466426	0.000666933	0.484587
I(Age-8):score	0.000979467	0.000243447	5.8729e-05		0.00831957	0.0030856	0.00704183		0.000830982	0.000306606	0.00675946		Tempo	-0.00719642	0.00256906	0.00524857
I(Age-8)^2:score	-3.78469e-05	2.32946e-05	0.104325		-1.1938e-05	0.000229714	0.958556		-2.17348e-05	0.000406378	0.95735		Velocity	0.00087247	0.00158495	0.582193
I(Age-8)^3:score	-6.57593e-06	3.42516e-06	0.054962		-5.69181e-05	4.38191e-05	0.194042		4.4646e-05	0.000204324	0.827049
